# Supplementary material for: A bivalent remipede toxin promotes calcium release via ryanodine receptor activation
Source: Springer Nature journal article supplement (doi:10.1038/s41467-023-36579-w), 2023-02-23
Supplement: MOESM1 [file 41467_2023_36579_MOESM1_ESM.pdf]

1  
2  
3  
4  
5  
6  
7  
8  
9  
10  
11  
12  
13  
14  
15  
16  
17  
18  
19  
20  
21  
22  
23  
24  
25  
26  
27  
28  
29  
30  
31  
32  
33  
34  
35

## Supplementary Information for

### **A bivalent remipede toxin promotes calcium release via ryanodine receptor activation**

Michael J. Maxwell<sup>1a</sup>, Chris Thekkedam<sup>2</sup>, Cedric Lamboley<sup>1b</sup>, Yanni K. –Y. Chin<sup>1a</sup>, Theo Crawford<sup>1a</sup>, Jennifer J. Smith<sup>1c</sup>, Junyu Liu<sup>1a</sup>, Xinying Jia<sup>1a</sup>, Irina Vetter<sup>1c</sup>, Derek R. Laver<sup>2</sup>, Bradley S. Launikonis<sup>1b</sup>, Angela Dulhunty<sup>3</sup>, Eivind A. B. Undheim<sup>1a,c,4\*</sup>, Mehdi Mobli<sup>1a\*</sup>

#### **Affiliations**

<sup>1a</sup>Centre for Advanced Imaging, <sup>b</sup>School of Biomedical Sciences, <sup>c</sup>Institute for Molecular Bioscience, The University of Queensland, St. Lucia, QLD 4072, Australia.

<sup>2</sup>School of Biomedical Sciences and Pharmacy, University of Newcastle, Newcastle 2308, Australia

<sup>3</sup>Eccles Institute of Neuroscience, John Curtin School of Medical Research, Australian National University, Canberra, ACT 2601, Australia

<sup>4</sup>Centre for Ecological and Evolutionary Synthesis, Department of Biosciences, University of Oslo, 0316 Oslo, Norway

\*Corresponding Authors: Eivind A. B. Undheim, [e.a.b.undheim@ibv.uio.no](mailto:e.a.b.undheim@ibv.uio.no) or Mehdi Mobli, [m.mobli@uq.edu.au](mailto:m.mobli@uq.edu.au)

#### **This PDF file includes:**

- Supplementary Figs. 1 to 14
- Supplementary Tables 1 to 3
- Supplementary Data 1 to 2

36 **Supplementary Figures**  
37

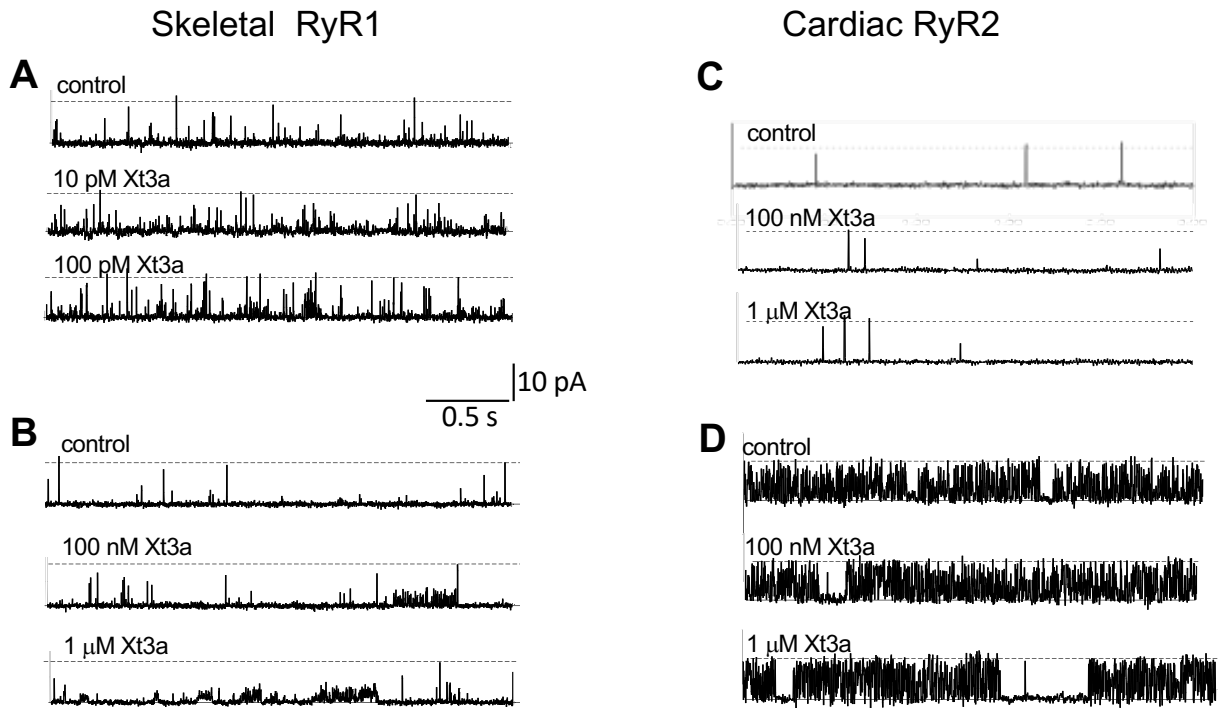

38  
39

40 **Supplementary Fig. 1.**

41 **Xt3a activates RyR1 at picomolar concentrations and inhibits channels**  
42 **at concentrations between 100 nM and 1 μM, but has no general effect on cardiac RyR2**  
43 **channels.** (A-B) shows traces from two different RyR1 channels at +40 mV exposed to 10 pM  
44 and 100 pM Xt3a (A), or 100 nM and 1 μM Xt3a (B). Note the increasing RyR1 channel opening  
45 to sub maximal conductance levels as [Xt3a] increases. (C-D) shows recordings from two different  
46 RyR2 channels exposed to 100 nM and 1 μM Xt3a, one with low endogenous activity (C), and the  
47 other with high endogenous activity (D).  
48

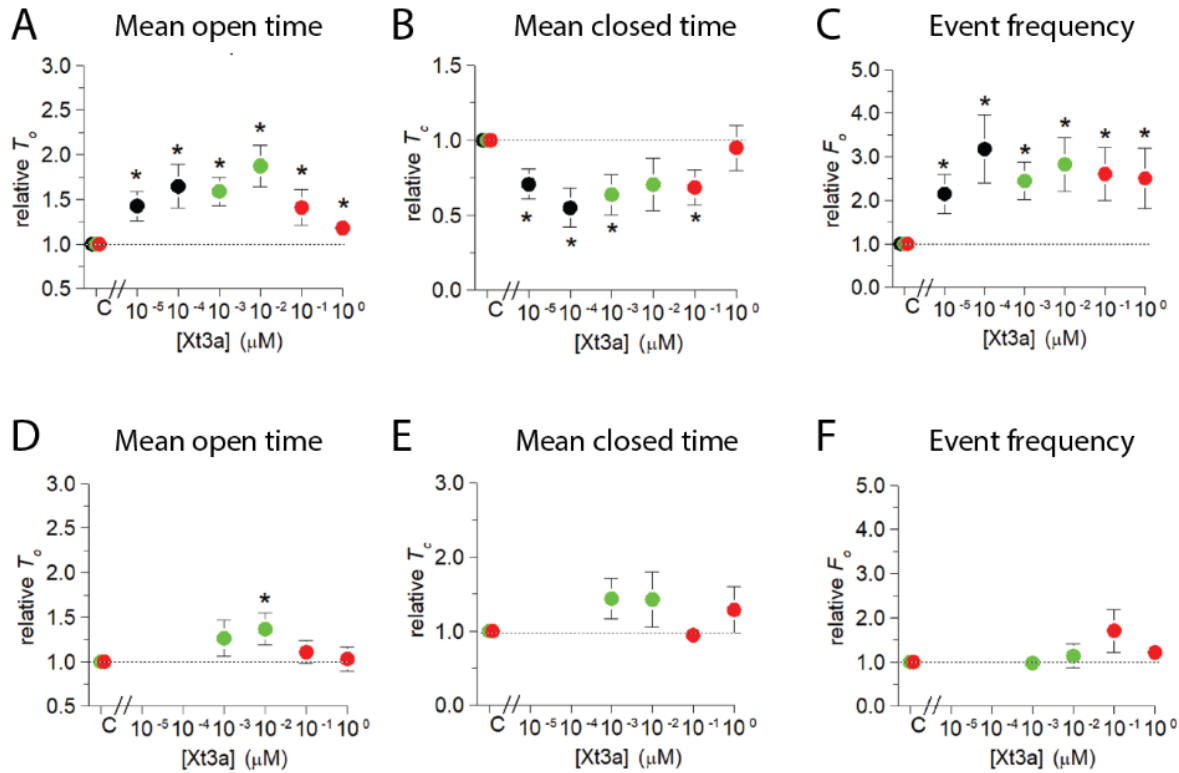

49

50 **Supplementary Fig. 2.**

51 **Xt3a induces significant changes in gating parameters in RyR1 channels, but not in RyR2.**

52 (A-F) Average normalized mean open time ( $T_o$ ), relative mean closed time ( $T_c$ ) and relative open  
 53 event frequency ( $F_o$ ) are plotted against [Xt3a] for RyR1 (A to C) and RyR2 (D to F). Data are  
 54 colour coded to indicate data obtained at 10 pM and 100 pM (black: RyR1, n=7:  $T_o$ ,  $P=2.07\text{E-}02$ ,  
 55  $P=2.02\text{E-}02$ ;  $T_c$ ,  $P=1.03\text{E-}02$ ,  $P=4.02\text{E-}03$ ;  $F_o$ ,  $P=1.53\text{E-}02$ ,  $P=1.49\text{E-}02$ ), 1 nM and 10 nM (green:  
 56 RyR1 n=7:  $T_o$ ,  $P=2.12\text{E-}03$ ,  $P=2.42\text{E-}03$ ;  $T_c$ ,  $P=1.60\text{E-}02$ ,  $P=1.25\text{E-}01$ ;  $F_o$   $P=4.42\text{E-}03$ ,  $P=9.92\text{E-}$   
 57  $03$ . RyR2, n=6:  $T_o$ ,  $P=2.24\text{E-}01$ ,  $P=3.21\text{E-}02$ ;  $T_c$ ,  $P=1.42\text{E-}01$ ,  $P=2.83\text{E-}01$ ;  $F_o$   $P=9.14\text{E-}01$ ,  
 58  $P=6.29\text{E-}01$ ) and 100 nM and 1  $\mu\text{M}$  (red: RyR1 n=10  $T_o$ ,  $P=2.65\text{E-}02$ ,  $P=2.84\text{E-}02$ ;  $T_c$ ,  $P=1.45\text{E-}$   
 59  $02$ ,  $P=3.71\text{E-}01$ ;  $F_o$ ,  $P=1.24\text{E-}02$ ,  $P=4.28\text{E-}02$ ; RyR2 n=6:  $T_o$ ,  $P=4.22\text{E-}01$ ,  $P=8.16\text{E-}01$ ;  $T_c$ ,  
 60  $P=6.83\text{E-}01$ ,  $P=3.76\text{E-}01$ ;  $F_o$   $P=1.74\text{E-}01$ ,  $P=2.67\text{E-}01$ ). Asterisks indicate values that are  
 61 significantly different from control. The symbols show mean $\pm$ SEM and n refers to the number of  
 62 observations included in the mean. Two independent observations obtained at +40 mV and -40  
 63 mV, measure current flow in opposite directions through the channel pore, are included as the  
 64 effect of Xt3a was similar at the two potentials. Significance was determined using a two sided  
 65 Students t-test.

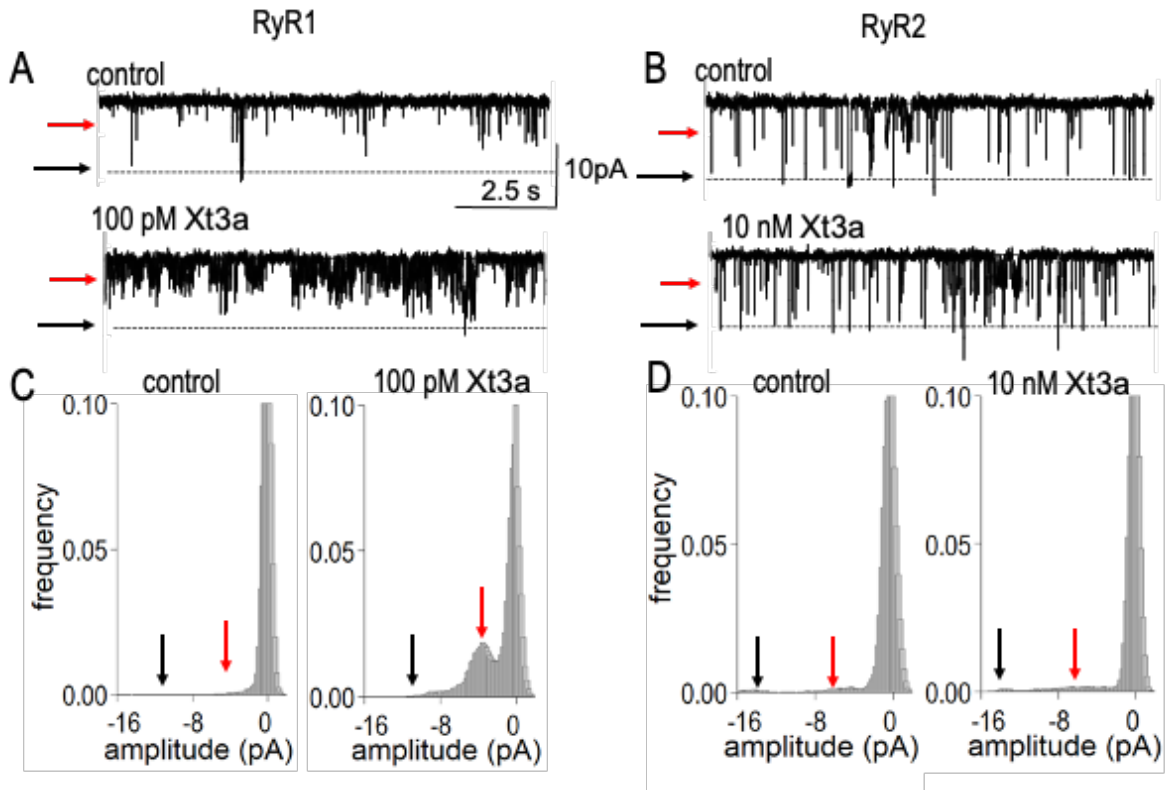

66

67 **Supplementary Fig. 3.**

68 **Strong stabilization of substate activity by Xt3A in RyR1 at -40 mV.** A) and B) show ten  
 69 second recordings from RyR1 and RyR2 channels at -40 mV with Xt3a: in A) from an RyR1  
 70 channel before exposure (control) and after exposure to 100 pM Xt3a and B) from an RyR2  
 71 channel, control and with 10 nM Xt3a. The recordings demonstrate prolonged periods of channel  
 72 gating to substate levels at <50% of the maximum conductance. The broken line in each of the  
 73 recordings marks the maximum conductance level. C) and D) show amplitude histograms for  
 74 RyR1 (C) and RyR2 (D) from the recordings shown above. In A) to D) the black arrows indicate  
 75 the maximum open current level and the red arrows point to the predominant substate current level.  
 76

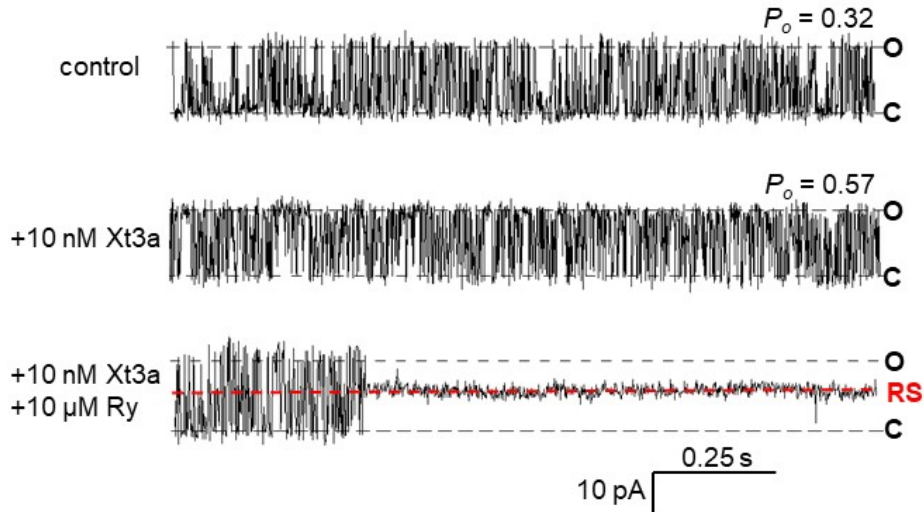

77

78 **Supplementary Fig. 4.**

79 **Electrophysiological response after addition of Xt3a and ryanodine.** Recordings from RyR1  
 80 +40 mV from one experiment representative of four. A single high activity channel was obtained  
 81 under control conditions (control), and after 1 min exposure to 10 nM Xt3a (Xt3a) and after 4 s of  
 82 further addition of 10  $\mu$ M ryanodine (Ry). The classical ryanodine block of normal channel gating  
 83 and entry into the substate at ~50% of the fully open conductance commences approximately 0.35 s  
 84 into the trace. The parallel lines (labelled C and O) indicate the closed (C) level and fully open (O)  
 85 levels respectively. The red line (labelled **RS**) indicates the ryanodine substate. Open probability  
 86 ( $P_o$ ) is shown above the control and Xt3a records.

87

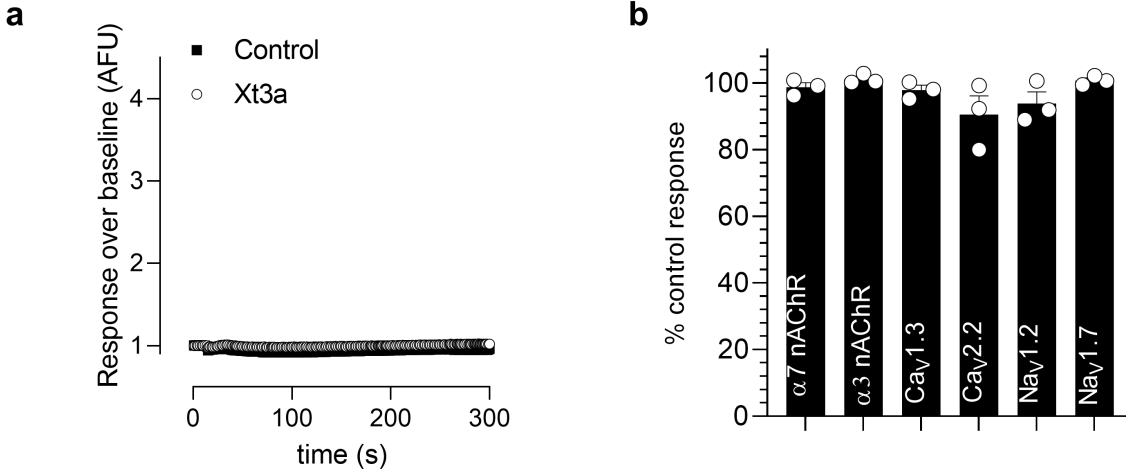

88  
89

90 **Supplementary Fig. 5.**

91 **Xt3a does not elicit Ca<sup>2+</sup> responses or inhibit endogenously expressed ion channels in SH-**  
 92 **SY5Y cells.** (a) Addition of Xt3a (3 μM) does not elicit an increase in intracellular Ca<sup>2+</sup> responses.  
 93 (b) Xt3a (3 μM) does not inhibit endogenously expressed α7 nAChR, α3-containing nAChR,  
 94 Cav1.3, Cav2.2, Nav1.2 and Nav1.7 channels. Responses over 300 s after pre-treatment with Xt3a  
 95 (3 μM) were expressed relative to control responses elicited by subtype-selective agonists.  
 96 Experiments were performed in triplicate, data is presented as mean ± standard deviation.

97

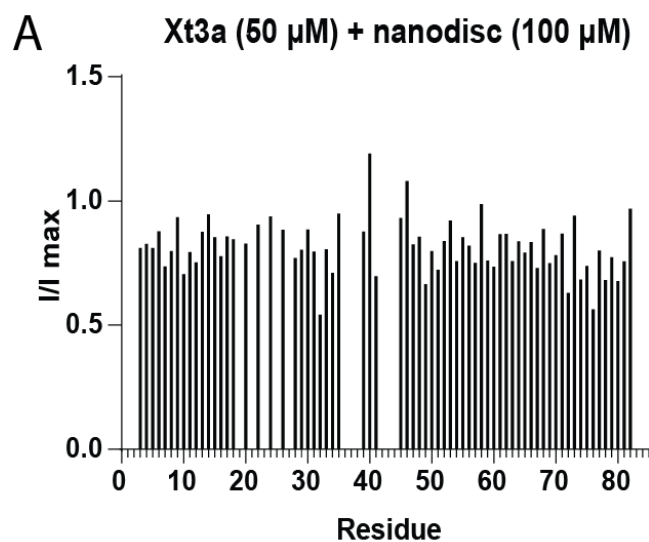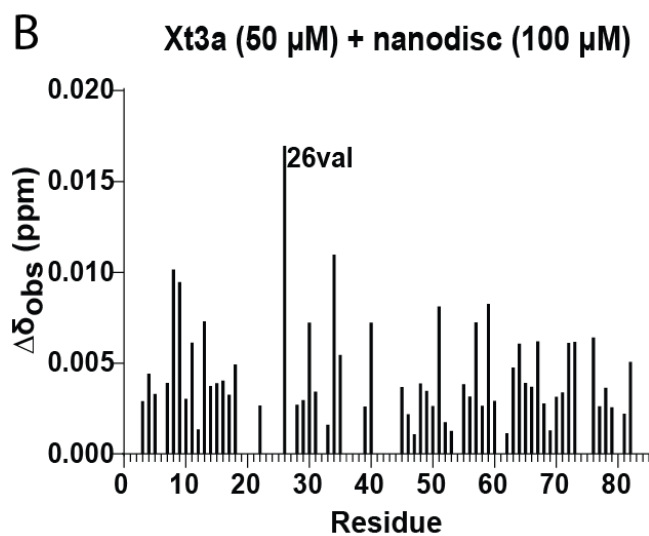

100 **Supplementary Fig. 6.**

101 **Xt3a binds weakly and non-specifically to lipid bilayers.**  $^{15}\text{N}$ -HSQC measurements of Xt3a  
 102 with and without nanodiscs containing zwitterionic (POPC) lipids. (A) Changes in peak intensity  
 103 for each amide resonance ( $I/I_{\max}$ ). (B) Observed chemical shift differences for each amide  
 104 resonance ( $\Delta\delta_{\text{obs}}$  (ppm)).

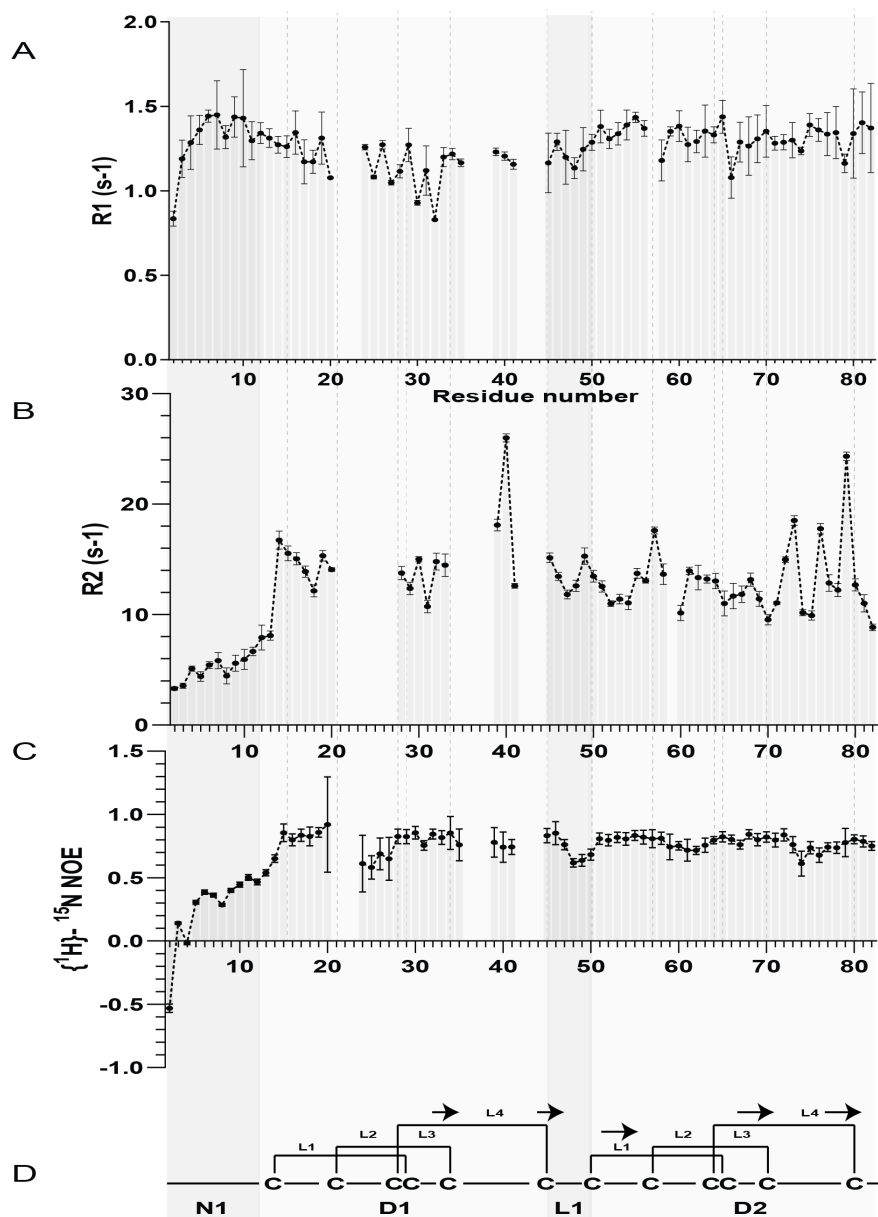

105

106 **Supplementary Fig. 7.**

107 **Dynamics of Xt3a from backbone  $^{15}\text{N}$ -NMR spin relaxation experiments.** (A)  $^{15}\text{N}$ -R1  
 108 relaxation rate values derived from fitting to measurements for each backbone amide. Residue  
 109 Cys57 was removed due to poor signal quality (error bars based on fitting uncertainty of the time  
 110 constant). (B)  $^{15}\text{N}$ -R2 relaxation rate values derived from fitting to measurements for each  
 111 backbone amide. Residue Leu59 was removed due to poor signal quality (error bars based on  
 112 fitting uncertainty of the time constant). (C)  $^1\text{H}$ - $^{15}\text{N}$  heteronuclear NOE ratios (errors based on  
 113 spectral noise). No amide resonances were observed between residues positions 21-23, 36-38, and  
 114 42-44. (D) Schematic of Xt3a architecture, highlighting the N-terminal region (N1), each disulfide  
 115 rich domain (D1, D2), and the -connecting linker region L1. The cysteine connectivity is shown  
 116 with horizontal brackets, the inter-cysteine loops labelled L1-L4 with dashed lines highlighting  
 117 their corresponding position in the above plots, and arrows indicating the anti-parallel  $\beta$ -sheets.

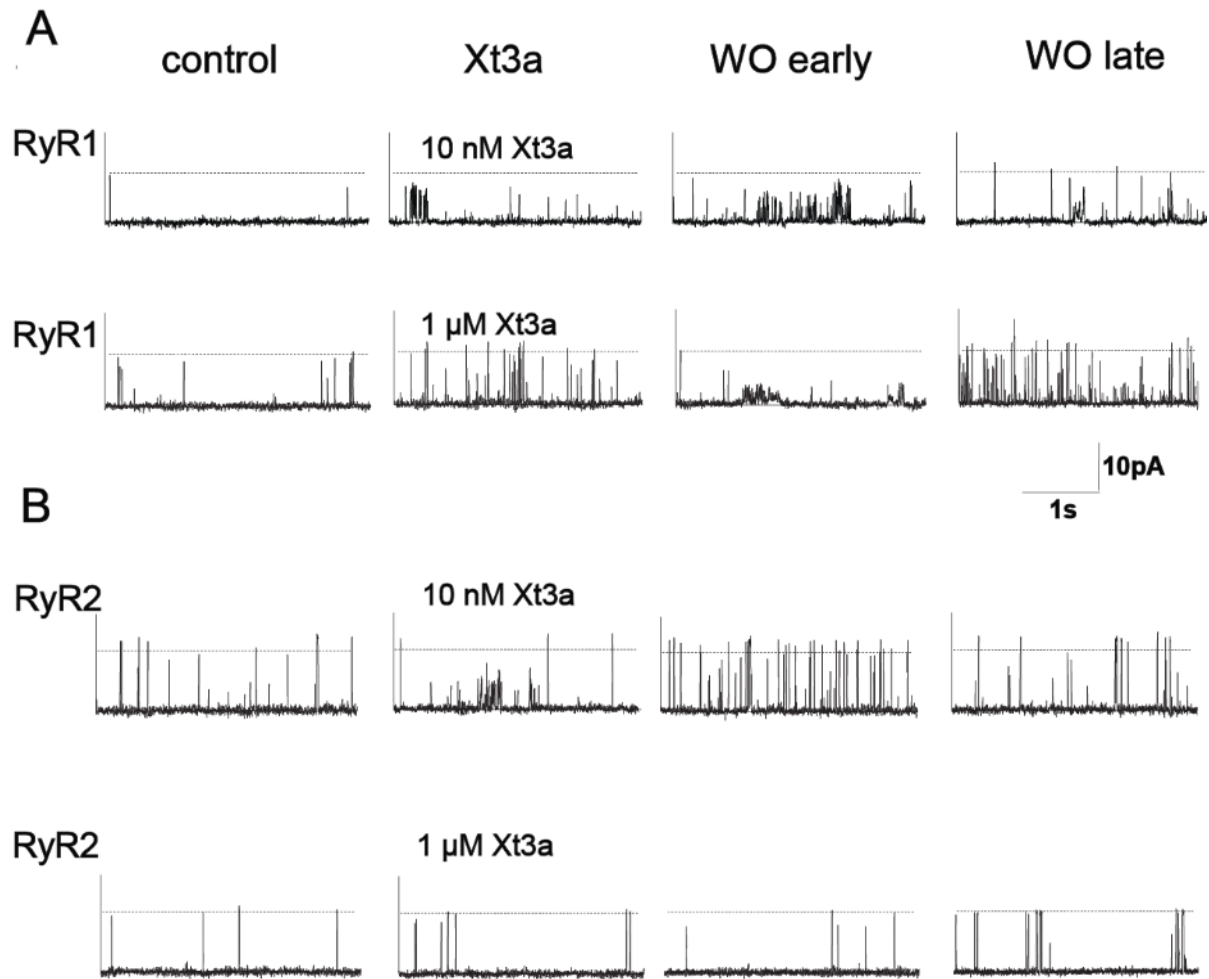

118

119

**Supplementary Fig. 8.**

120

**Limited reversibility of Xt3a effects on RyR1 channels, consistent with the apparent high affinity binding of the toxin to the channel.** The records shown contribute to the average data in

121

Figure 3 of the manuscript. Details of quantification and statistics are given in the manuscript for

122

the subset of data given in the Figure 3. Recordings from RyR1 channels are shown in (A) and

123

from RyR2 channels are shown in (B). In (A) and (B), recordings from representative channels at

124

+40 mV are shown, under control conditions (column 1), after ~10 min exposure to the indicated

125

concentration of Xt3a (column 2), within 3 min removal of Xt3a by perfusion of the cis chamber

126

(column 3) and finally ~15-20 min after perfusion (column 4).

127

128

129  
130

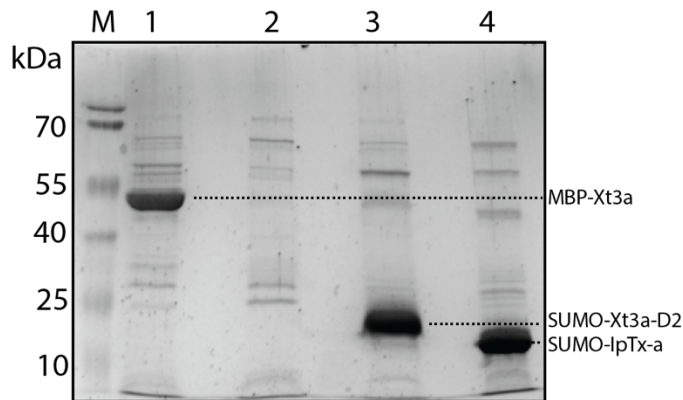

131

132 **Supplementary Fig. 9.**

133 **SDS-PAGE representative of the purification of MBP and SUMO fusion protein constructs.**

134 Each lane corresponds to: M, molecular mass markers; 1, eluate of the MBP-Xt3a fusion protein  
135 from the Ni-NTA beads; 2, eluate of SUMO-Xt3a-D1 (unsuccessful purification); eluate of  
136 SUMO-Xt3a-D2 fusion protein from Ni-NTA beads; 4, and eluate of SUMO-IpTxA fusion protein  
137 from Ni-NTA beads.

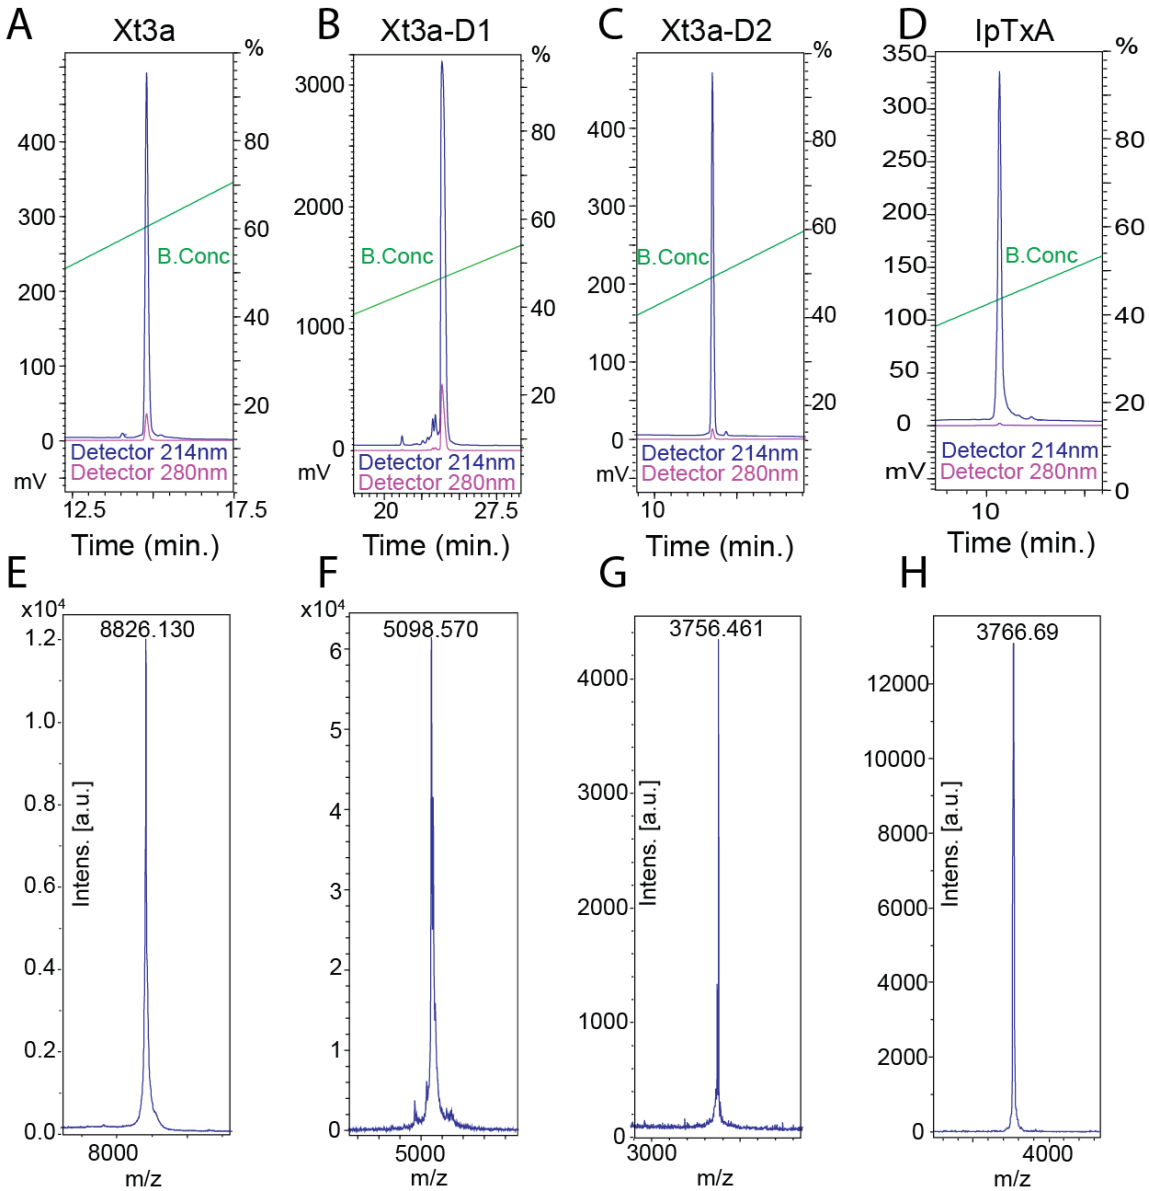

138

139 **Supplementary Fig. 10.**

140 **Purification and mass analysis of recombinantly produced Xt3a, Xt3a-D1, Xt3a-D2, and**  
 141 **IpTxA.** (A, B, C, D) Analytical RP-HPLC chromatogram showing pure recombinant Xt3a, Xt3a-  
 142 D1, Xt3a-D2, and IpTxA. (E, F, G, H) Matrix-assisted laser desorption/ionization (MALDI-TOF)  
 143 spectrum of purified Xt3a, Xt3a-D1, Xt3a-D2, and IpTxA.  
 144

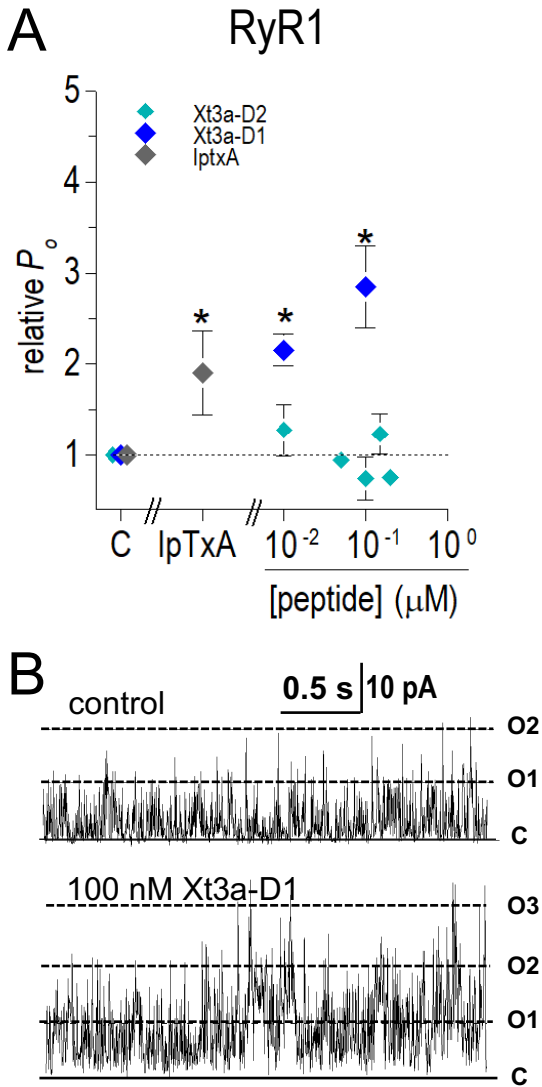

145

146 **Supplementary Fig. 11.**

147 **Xt3a and Xt3a-D1 activate ryanodine receptors (RyRs) in a similar way to other toxins in**

148 **the calxin family.** (A) data color coded to differentiate peptides examined. Blue: Xt3a-D1, 10 nM,

149 n=6,  $P=1.31\text{E-}03$ ; 100 nM, n=7,  $P=3.23\text{E-}03$ ; Cyan: Xt3a-D2, 10 nM, n=6,  $P=3.07\text{E-}01$ ; 50 nM,

150 n=3,  $6.93\text{E-}01$ ; 100 nM n=3,  $P=3.93\text{E-}01$ ; 150 nM, n=3,  $P=4.00\text{E-}01$ ; 200 nM, n=3,  $P=1.56\text{E-}01$ .

151 Charcoal: IpTxA concentrations tested (0.1 nM n=2, 1 nM n=3, 10 nM n=2) were grouped (n=7,

152  $P=3.7\text{E-}02$ ) and show activation within a similar range, and to previous reports<sup>1</sup>. Asterisks indicate

153 values that are significantly different from control. The symbols show mean $\pm$ SEM and n refers to

154 the number of observations included in the mean. All data in this figure was obtained at +40mV.

155 Significance of was determined using a two sided Students t-test. (B) shows 3 s from a RyR1

156 channel before and after exposure to 100 nM Xt3a-D1. The parallel lines (labelled C, O1, O2 and

157 O3 in (G) indicate the closed level and open levels when 1, 2 or 3 channels respectively open

158 simultaneously.

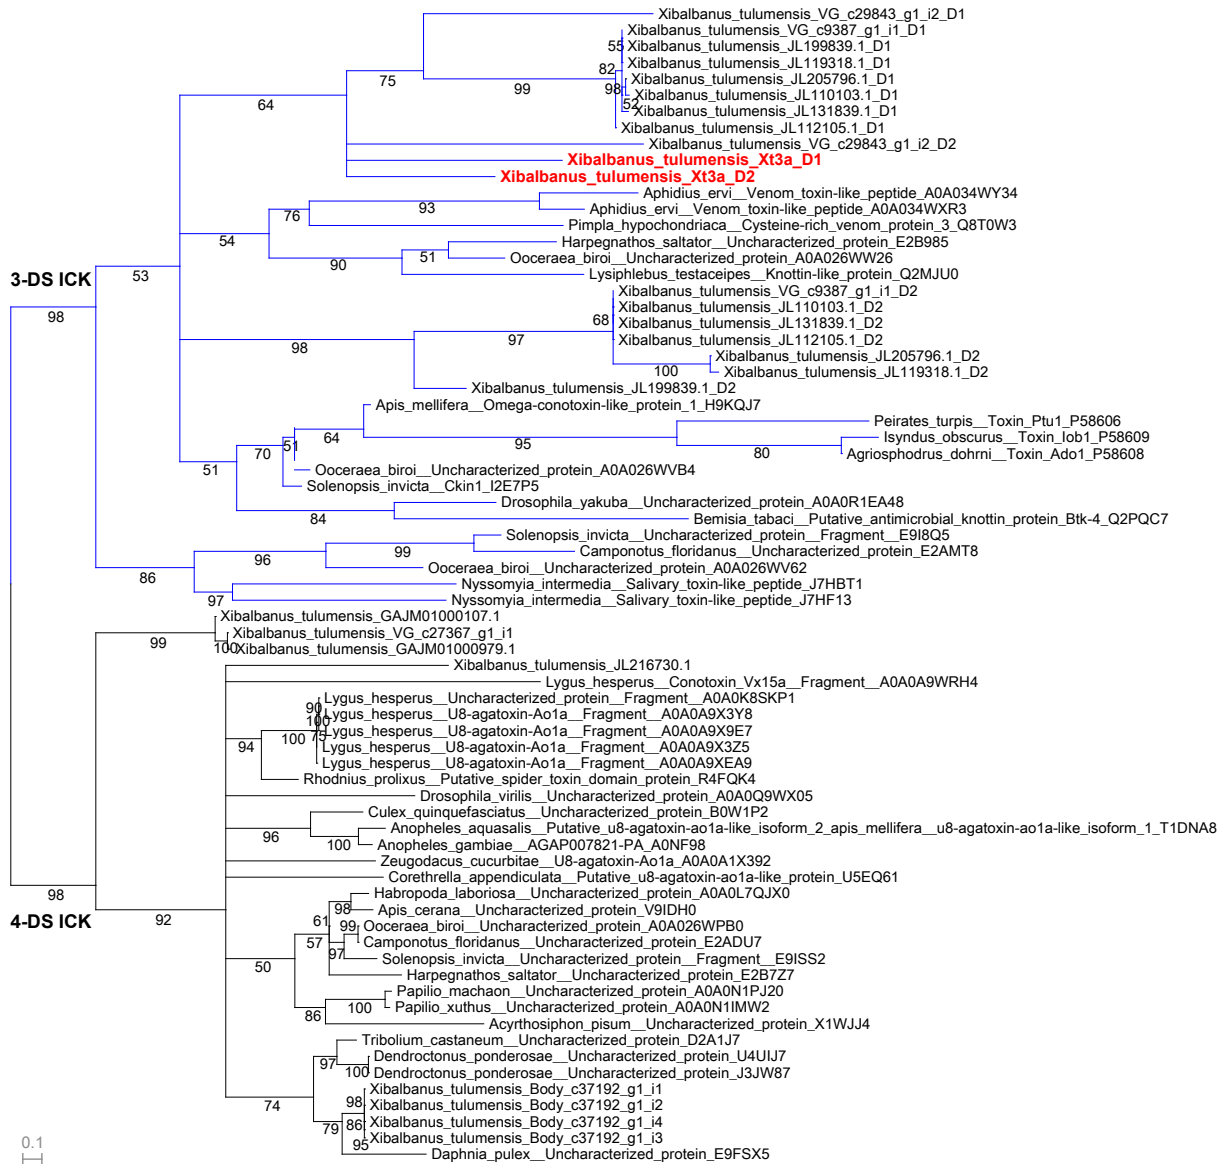

159  
160

161 **Supplementary Fig. 12.**

162 **Full maximum likelihood consensus tree generated under the evolutionary model VT+I+G4.**

163 Branch support values were estimated by ultrafast bootstrap using 10,000 replicates and branches

164 with confidence < 50 are collapsed into multifurcations. Branches in the three-disulfide ICK clade

165 (3-DS ICK) are coloured blue, while branches in the four-disulfide ICK clade (4-DS ICK) are

166 coloured black. The two Xt3a domains are highlighted in bold red.

167

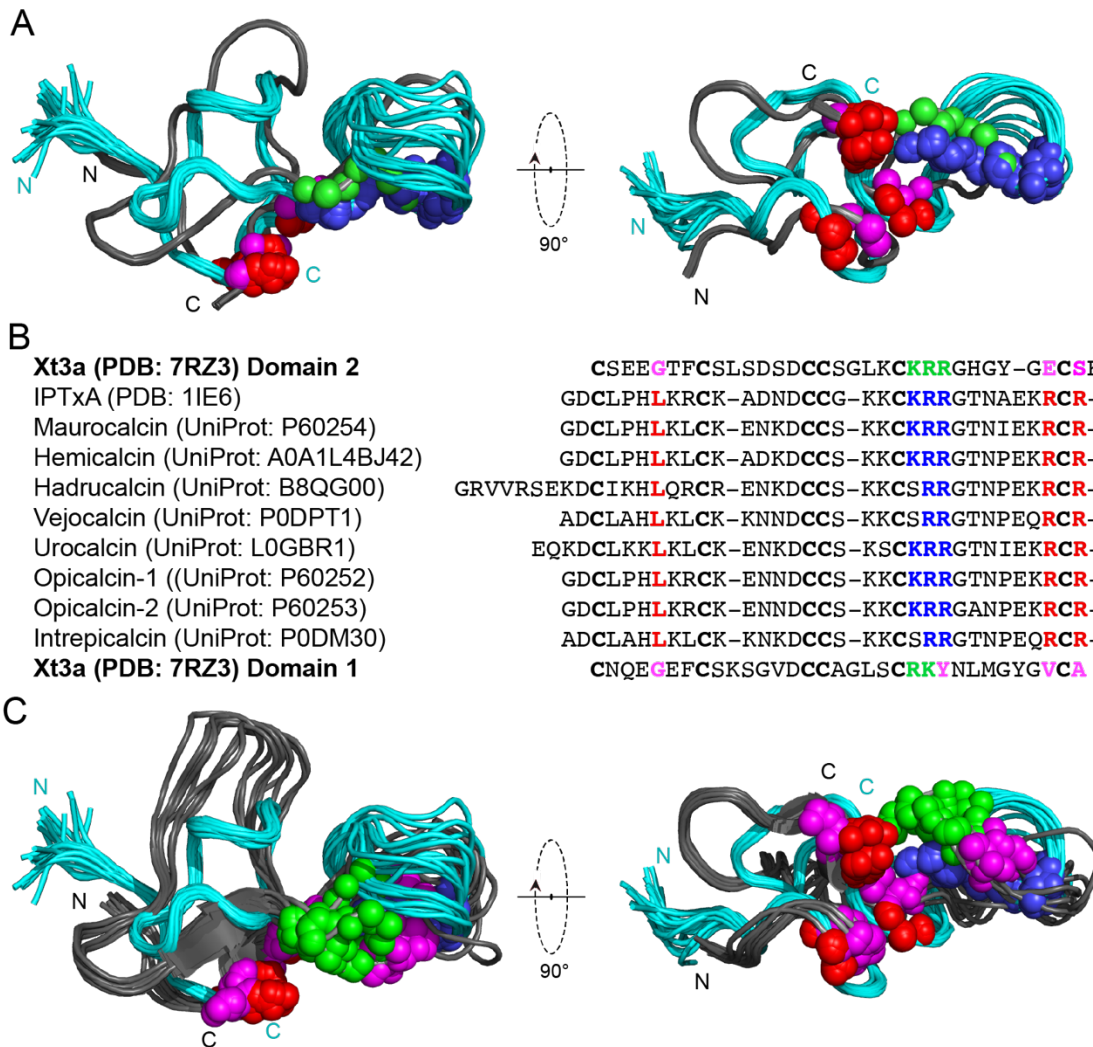

168

169 **Supplementary Fig. 13.**

170 **Xt3a lacks many of the residues that are critical for RyR activity of calcins.** (A) Xt3a-D2 lacks  
 171 half of the structural interface thought to facilitate the binding of calcins to RyR. IpTxA (PDB  
 172 1IE6; cyan) aligns to Xt3a-D2 (dark grey) with an RMSD of 3.319 Å (pymol cealign). Locations  
 173 of residues critical for RyR activity of IpTxA are indicated by spheres, where blue residues are  
 174 present in both IpTxA and Xt3a-D2, while red residues are present in IpTxA only. The locations  
 175 of the corresponding residues in Xt3a-D2 are indicated by green and magenta spheres,  
 176 respectively. (B) Multiple sequence alignment of calcins against Xt3a-D2 (top) and Xt3a-D1  
 177 (bottom) with residues critical for RyR activity of calcins, and the corresponding residues in Xt3a-  
 178 D2 and D1, highlighted in bold and coloured as in panel A. Cysteines are shown in bold but  
 179 coloured black. (C) Structural alignment of Xt3a-D1 (dark grey) to IpTxA (cyan; pymol cealign,  
 180 RMSD 4.170 Å) showing that Xt3a-D1 lacks most of the structural interface thought to facilitate  
 181 the binding of calcins to RyR. Residues are coloured as in panel A.

182

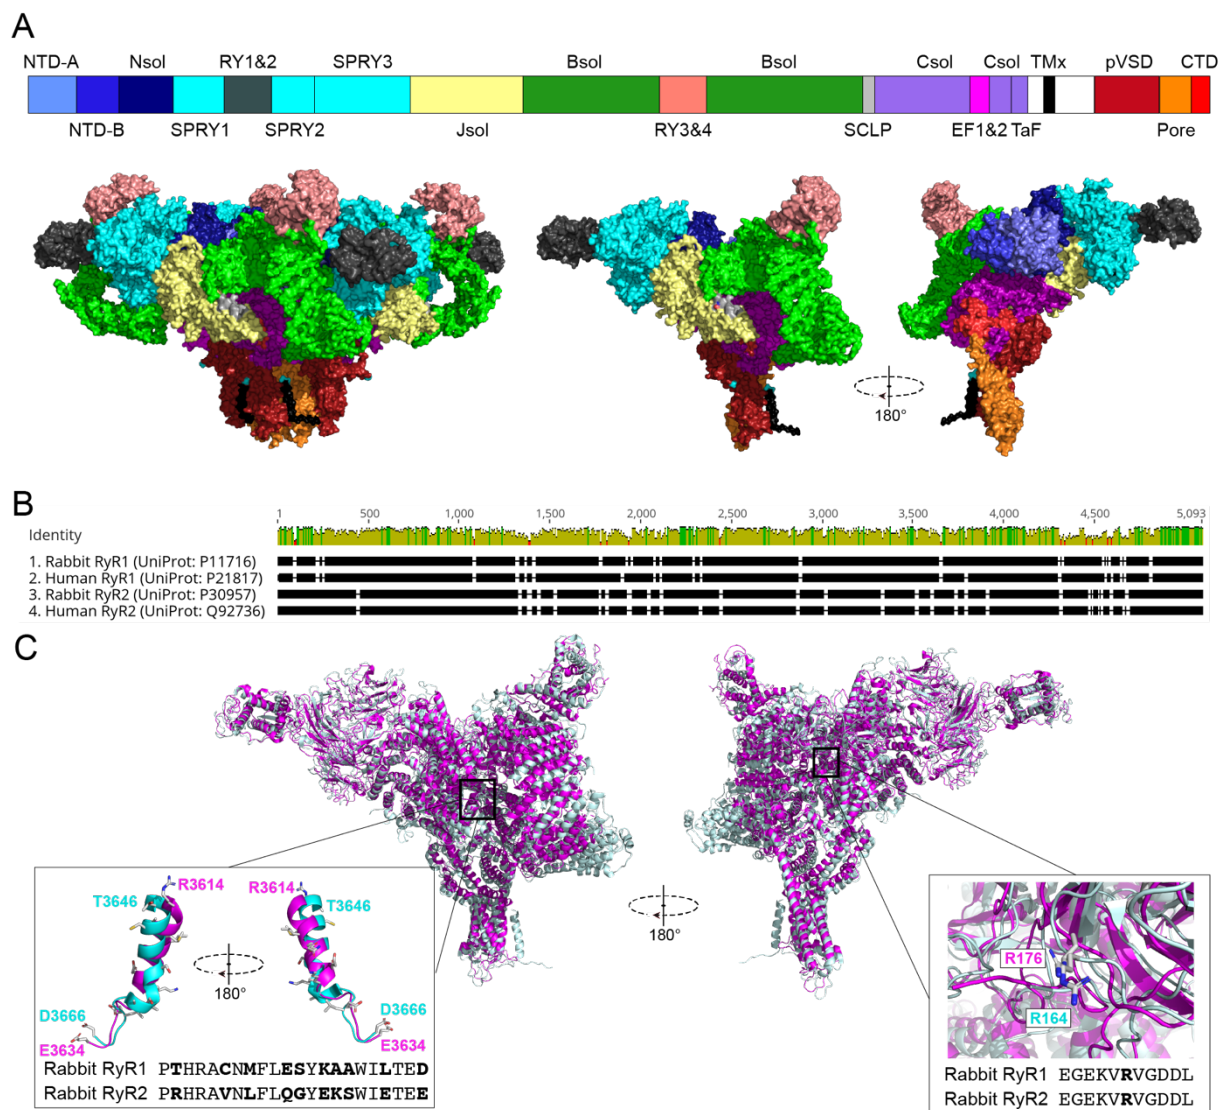

183

184 **Supplementary Fig. 14.**

185 **Some structural differences between RyR1 and RyR2.** (A) Top: Overview of the domain  
 186 organisation of RyR. Bottom: Surface view of full (left) and single subunit (right) of rabbit RyR1  
 187 (PDB 5TB2) with domains coloured as the diagram above. Domain terminologies and boundaries  
 188 are from Georges *et al.*<sup>2</sup>: N-terminal domain A (NTD-A); N-terminal domain B (NTD-B); N-  
 189 terminal solenoid (Nsol); SP1a/ryanodine receptor domains 1-3 (SPRY1, SPRY2, SPRY3); RYR  
 190 repeats 1&2 and 3&4 (RY1&2, RY3&4); junctional solenoid (Jsol), bridging solenoid (Bsol),  
 191 shell-core linker peptide, CaM, and JSol binding sites (SCLP); C-terminal solenoid (Csol); EF-  
 192 hand pair (EF1&2); auxiliary transmembrane helices (TMx); pseudo voltage sensor domain  
 193 (pVSD); C-terminal domain (CTD). (B) Global view of multiple sequence alignment of human  
 194 and rabbit RyR1 and RyR2 generated using the local paired iterative alignment method (L-INS-i)  
 195 in MAFFT v7.304b64<sup>3</sup> and visualized using Geneious v2022.1 (Biomatters, NZ). Bars represent  
 196 site-specific sequence conservation, where the majority of differences are between the two RyR  
 197 paralogue pairs: while the RyR orthologues are overall much more conserved (96.532 % and  
 198 98.591 % pairwise sequence identity for RyR1 and RyR2, respectively) than the RyR paralagues  
 199 (65.068 % and 65.107 % pairwise sequence identity for human and mouse, respectively). (C)

200 Structures of single subunits of rabbit RyR1 (PDB 5TB2; light cyan) and RyR2 (PDB 5L1D;  
201 magenta) from closed channels align with an RMSD of 9.097 Å across all aligned atoms although  
202 several outliers are visible, such as between the Bsol domains. Differences in primary structures  
203 of RyR1 and RyR2 are also present in well-aligned domains (e.g., C-terminal part of the SCLP  
204 domains; left inset; differing residues highlighted in bold and their side-chains shown as tubes). In  
205 addition, mutations of conserved, well-aligned residues may have completely different effects,  
206 such as the mutation of R164 in RyR1 and R176 in RyR2 (right inset; highlighted in bold and their  
207 side-chains shown as tubes) to a non-charged residue, which results in a much greater increase in  
208 open state probability in RyR1 than in RyR2<sup>4</sup>.  
209  
210

211 **Supplementary tables**212 **Supplementary Table 1.**213 **Structural statistics for the NMR ensemble of Xt3a<sup>a</sup>**

| PDB ID                                           | 7RZ3            |
|--------------------------------------------------|-----------------|
| Experimental restraints                          |                 |
| Inter-proton distance restraints                 |                 |
| Total                                            | 1326            |
| Intra-residue ( $i = j$ )                        | 330             |
| Sequential ( $ i - j  = 1$ )                     | 407             |
| Medium range ( $1 <  i - j  < 5$ )               | 191             |
| Long range ( $ i - j  \geq 5$ )                  | 398             |
| Disulfide bond restraints                        | 18              |
| Dihedral-angle restraints ( $\phi, \psi$ )       | 146             |
| $\phi$ dihedral angle restraints                 | 67              |
| $\psi$ dihedral angle restraints                 | 63              |
| $\chi_1$ angle restraints                        | 16              |
| Mean number of restraints per residue            | 18.2            |
| Violations of experimental restraints            | 2               |
| RMSD to mean coordinate structure (Å)            |                 |
| All backbone atoms                               | $2.30 \pm 0.86$ |
| All heavy atoms                                  | $2.65 \pm 0.87$ |
| Backbone atoms (residues 14-34, 43-80)           | $0.44 \pm 0.14$ |
| Heavy atoms (residues 14-34, 43-80)              | $0.73 \pm 0.16$ |
| Stereochemical quality <sup>b</sup>              |                 |
| Ramachandran plot statistics                     |                 |
| Residues in most favored Ramachandran region (%) | $87.4 \pm 1.6$  |
| Disallowed regions [%]                           | $0.0 \pm 0.0$   |
| Unfavorable sidechain rotamers [%]               | $11.2 \pm 1.2$  |
| Clashscore, all atoms <sup>c</sup>               | $0.0 \pm 0.0$   |
| Overall MolProbity score                         | $1.91 \pm 0.05$ |

214 <sup>a</sup> All statistics are given as mean  $\pm$  S.D.215 <sup>b</sup> Stereochemical quality according to MolProbity (<http://helix.research.duhs.duke.edu>).216 <sup>c</sup> Clashscore is defined as the number of steric overlaps  $>0.4$  Å per 1000 atoms.

217

218 **Supplementary Table 2.**

219 **Site-specific substitution rates determined by maximum likelihood**

| N-terminal tail |           | ICK domain 1 |           | Linker |           | ICK domain 2 |           | C-terminal tail |           |
|-----------------|-----------|--------------|-----------|--------|-----------|--------------|-----------|-----------------|-----------|
| Sit             |           | Sit          |           | Sit    |           | Sit          |           | Sit             |           |
| e               | Rate (ML) | e            | Rate (ML) | e      | Rate (ML) | e            | Rate (ML) | e               | Rate (ML) |
| 1               | 1.54796   | 16           | 0.04649   | 47     | 0.41298   | 53           | 0.04649   | 86              | 26.54583  |
| 2               | 0.54549   | 17           | 0.51227   | 48     | 0.04649   | 54           | 0.41163   | 87              | 0.04649   |
| 3               | 1.0272    | 18           | 1.14064   | 49     | 0.65161   | 55           | 0.38642   | 88              | 41.4585   |
| 4               | 0.34311   | 19           | 0.28378   | 50     | 0.62833   | 56           | 0.67487   | 89              | 0.04649   |
| 5               | 0.8244    | 20           | 0.54241   | 51     | 1.94861   | 57           | 0.04649   | 90              | 0.2721    |
| 6               | 0.45354   | 21           | 1.02027   | 52     | 1.43003   | 58           | 0.41962   | 91              | 0.95172   |
| 7               | 0.25139   | 22           | 1.06503   |        |           | 59           | 0.88969   | 92              | 0.17839   |
| 8               | 0.04649   | 23           | 0.04649   |        |           | 60           | 0.04649   | 93              | 1.02361   |
| 9               | 0.04649   | 24           | 1.25779   |        |           | 61           | 4.46369   |                 |           |
| 10              | 1.16623   | 25           | 1.0084    |        |           | 62           | 4.33532   |                 |           |
| 11              | 2.15348   | 26           | 1.20354   |        |           | 63           | 3.29069   |                 |           |
| 12              | 0.59215   | 27           | 1.20154   |        |           | 64           | 0.88923   |                 |           |
| 13              | 2.67731   | 28           | 2.39168   |        |           | 65           | 4.91918   |                 |           |
| 14              | 1.37549   | 29           | 0.56357   |        |           | 66           | 0.76489   |                 |           |
| 15              | 0.43058   | 30           | 0.04649   |        |           | 67           | 0.04649   |                 |           |
|                 |           | 31           | 0.04649   |        |           | 68           | 0.04649   |                 |           |
|                 |           | 32           | 1.81822   |        |           | 69           | 23.58636  |                 |           |
|                 |           | 33           | 0.75351   |        |           | 70           | 0.36768   |                 |           |
|                 |           | 34           | 0.04649   |        |           | 71           | 0.30266   |                 |           |
|                 |           | 35           | 1.38722   |        |           | 72           | 41.45335  |                 |           |
|                 |           | 36           | 0.04649   |        |           | 73           | 0.04649   |                 |           |
|                 |           | 37           | 0.87793   |        |           | 74           | 2.27131   |                 |           |
|                 |           | 38           | 0.14624   |        |           | 75           | 1.51354   |                 |           |
|                 |           | 39           | 0.04649   |        |           | 76           | 10.19598  |                 |           |
|                 |           | 40           | 1.45829   |        |           | 77           | 5.95095   |                 |           |
|                 |           | 41           | 1.92611   |        |           | 78           | 4.86007   |                 |           |
|                 |           | 42           | 0.76378   |        |           | 79           | 9.13753   |                 |           |
|                 |           | 43           | 1.01329   |        |           | 80           | 5.44183   |                 |           |
|                 |           | 44           | 0.95717   |        |           | 81           | 0.04649   |                 |           |
|                 |           | 45           | 0.75918   |        |           | 82           | 0.36768   |                 |           |
|                 |           | 46           | 0.04649   |        |           | 83           | 6.69296   |                 |           |
|                 |           |              |           |        |           | 84           | 0.04649   |                 |           |
|                 |           |              |           |        |           | 85           | 37.55001  |                 |           |

220

221

222 **Supplementary Table 3.**223 **The ten ICK domains most similar to Xt3a domains 1 and 2 in three-dimensional sequence**  
224 **space<sup>a</sup>**

| <b>Name</b>                                                      | <b>Accession</b> | <b>Distance</b> |
|------------------------------------------------------------------|------------------|-----------------|
| <b>Domain 1</b>                                                  |                  |                 |
| Xibalbin 3 domain 1                                              | JL119318.1       | 0.306           |
| Xibalbin 3 domain 1                                              | JL110103.1       | 0.308           |
| Xibalbin 3 domain 1                                              | JL112105.1       | 0.409           |
| Ado1 ( <i>Agriosphodrus dohrni</i> )                             | P58608           | 0.683           |
| Mu-cyrtautoxin-As1a ( <i>Apomastus schlingeri</i> )              | P49268           | 0.699           |
| Xt3a domain 2                                                    | JL106434.1       | 0.785           |
| Mu-thomitoxin-Hme1c ( <i>Heriaeus mellottei</i> )                | C0HJK5           | 1.010           |
| Omega-actinopoditoxin-Mb1a ( <i>Missulena bradleyi</i> )         | P83588           | 1.217           |
| Putative calcium channel toxin Tx758 ( <i>Buthus occitanus</i> ) | B8XH22           | 1.225           |
| Ptu1 ( <i>Peirates turpis</i> )                                  | P58606           | 1.237           |
| <b>BmCa.1 (<i>Mesobuthus martensii</i>)</b>                      | <b>Q8I6X9</b>    | <b>1.270</b>    |
| <b>Domain 2</b>                                                  |                  |                 |
| Xibalbin 3 domain 1                                              | JL119318.1       | 0.535           |
| Xibalbin 3 domain 1                                              | JL110103.1       | 0.540           |
| Xibalbin 3 domain 1                                              | JL112105.1       | 0.556           |
| Xt3a domain 1                                                    | JL106434.1       | 0.785           |
| <b>Imperacalcin (<i>Pandinus imperator</i>)</b>                  | <b>P59868</b>    | <b>0.788</b>    |
| Ado1 ( <i>Agriosphodrus dohrn</i> )                              | P58608           | 0.865           |
| <b>Opicalcin.1 (<i>Opisththalmus carinatus</i>)</b>              | <b>P60252</b>    | <b>0.970</b>    |
| <b>Opicalcin.2 (<i>Opisththalmus carinatus</i>)</b>              | <b>P60253</b>    | <b>0.979</b>    |
| <b>Vejocalcin (<i>Vaejovis mexicanus</i>)</b>                    | <b>P0DPT1</b>    | <b>0.997</b>    |
| <b>Iob1 (<i>Isyndus obscurus</i>)</b>                            | <b>P58609</b>    | <b>1.158</b>    |

225 <sup>a</sup>Calcins are shown in blue

226

227

228  
229  
230  
  
231  
232  
233  
234  
235  
236  
237  
238  
239  
  
240  
241  
242  
  
243  
244  
245  
  
246  
247  
248  
249  
  
250  
251

### Supplementary References

1. Dulhunty AF, Curtis SM, Watson S, Cengia L, Casarotto MG. Multiple actions of imperatoxin A on ryanodine receptors: interactions with the II-III loop "A" fragment. *J Biol Chem* **279**, 11853-11862 (2004).
2. des Georges A, *et al.* Structural Basis for Gating and Activation of RyR1. *Cell* **167**, 145-157.e117 (2016).
3. Katoh K, Standley DM. MAFFT Multiple Sequence Alignment Software Version 7: Improvements in Performance and Usability. *Mol Biol Evol* **30**, 772-780 (2013).
4. Iyer KA, Hu Y, Nayak AR, Kurebayashi N, Murayama T, Samsó M. Structural mechanism of two gain-of-function cardiac and skeletal RyR mutations at an equivalent site by cryo-EM. *Sci Adv* **6**, eabb2964.
